# Supplementary material for: Serum neurofilament light and tau as prognostic markers for all-cause mortality in the elderly general population—an analysis from the MEMO study
Source: Springer Nature journal article supplement (doi:10.1186/s12916-021-01915-8), 2021-02-15

—————  $p < 0.05$   
-----  $p > 0.05$

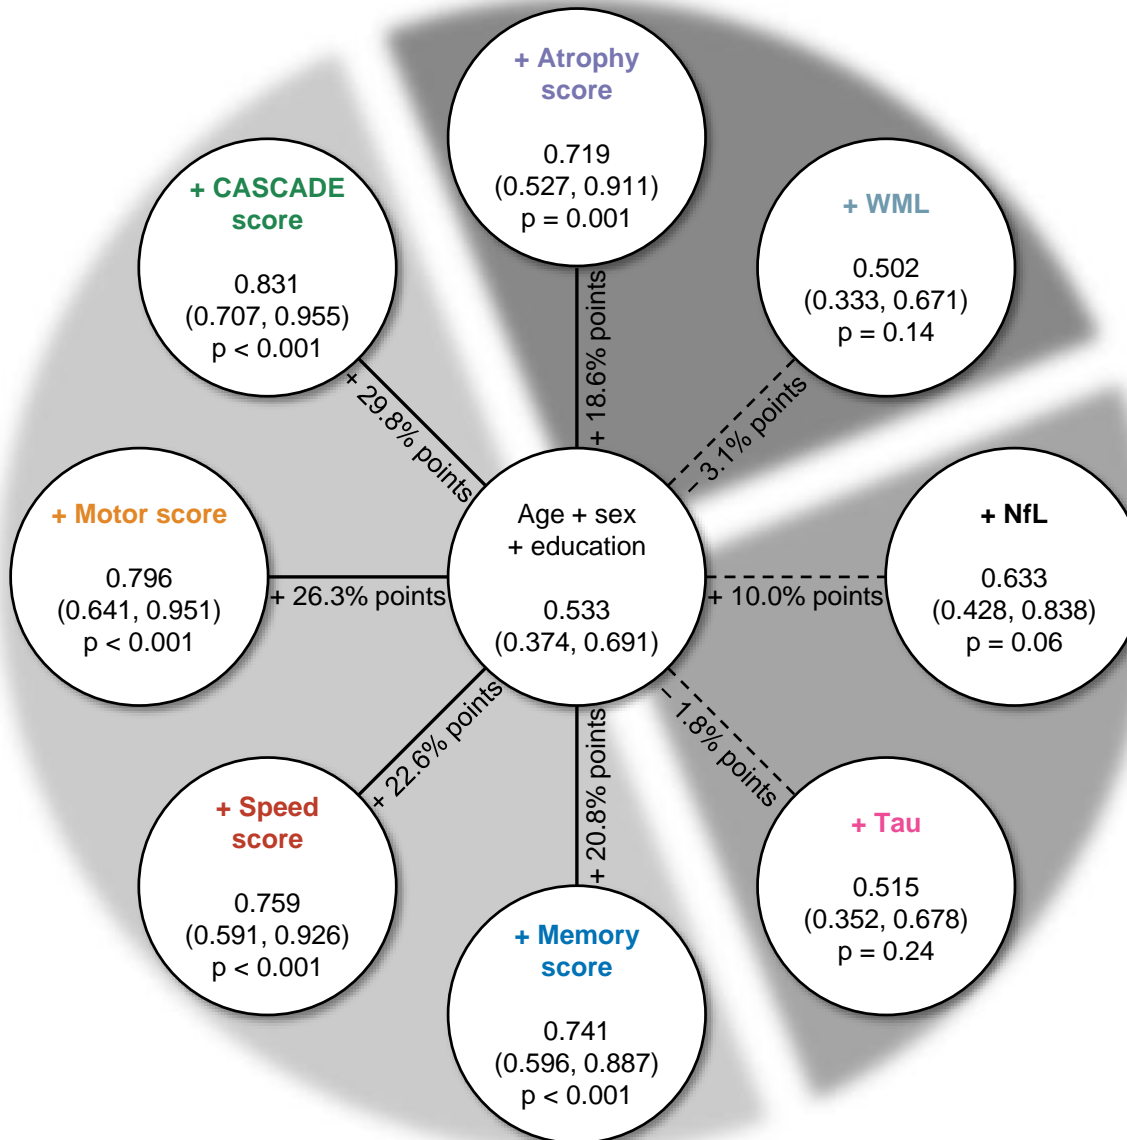

Supplement: MOESM2 [file 18863206]
